# Supplementary material for: Light-driven Au(iii)-promoted cleavage of triazole-bearing amine derivatives and its application in the detection of ionic gold
Source: Royal Society of Chemistry journal article supplement (doi:10.1039/c4cc06348a), 2014-01-01
Supplement: c4cc06348a2.pdf [file c4cc06348a2.pdf]

## Supporting Information

### **Light-driven Au(III)-promoted cleavage of triazole-bearing amine derivatives and its application in the detection of ionic gold**

*Dajeong Yim, Hongsik Yoon, Chi-Hwa Lee, and Woo-Dong Jang\**

## Experimental Details

### Materials and Measurements.

All commercially available reagents were reagent grade and used without further purification. Dichloromethane, n-hexane, and tetrahydrofuran (THF) were freshly distilled before each use. Following 23 kinds of metal salts were used for the metal ion selectivity test; 2:  $\text{Fe}(\text{ClO}_4)_3$ , 3:  $\text{Fe}(\text{ClO}_4)_2$ , 4:  $\text{AuCl}_3$ , 5:  $\text{Hg}(\text{OAc})_2$ , 6:  $\text{Zn}(\text{OAc})_2 \cdot 2\text{H}_2\text{O}$ , 7:  $\text{Pb}(\text{OAc})_2 \cdot 3\text{H}_2\text{O}$ , 8:  $\text{Ca}(\text{NO}_3)_2 \cdot 4\text{H}_2\text{O}$ , 9:  $\text{CoCl}_2 \cdot 6\text{H}_2\text{O}$ , 10:  $\text{MnSO}_4 \cdot x\text{H}_2\text{O}$ , 11:  $\text{Mg}(\text{NO}_3)_2 \cdot 6\text{H}_2\text{O}$ , 12:  $\text{Cu}(\text{OAc})_2$ , 13:  $\text{Cd}(\text{NO}_3)_2 \cdot 4\text{H}_2\text{O}$ , 14:  $\text{AlCl}_3$ , 15:  $\text{CrCl}_3 \cdot 6\text{H}_2\text{O}$ , 16:  $\text{AuCl}$ , 17:  $\text{AgClO}_4 \cdot x\text{H}_2\text{O}$ , 18:  $\text{NaClO}_4$ , 19:  $\text{PtCl}_2$ , 20:  $\text{PdCl}_2$ , 21:  $\text{Rh}(\text{OAc})_2$ , 21:  $\text{Ni}(\text{NO}_3)_2 \cdot 6\text{H}_2\text{O}$ , 23:  $\text{KClO}_4$ , 24:  $\text{Ba}(\text{NO}_3)_2$ . Electronic absorption spectra were recorded on a JASCO V-660 spectrometer. Fluorescence spectra were recorded on a JASCO FP-6300 spectrometer. All steady-state measurements were carried out by using a quartz cuvette with a pathlength of 1 cm at ambient temperatures.  $^1\text{H}$  and  $^{13}\text{C}$  NMR spectra were recorded on a Bruker Advance DPX 400 spectrometer at  $25^\circ\text{C}$  in  $\text{CDCl}_3$ ,  $\text{CD}_3\text{CN}$ , and  $\text{DMSO}-d_6$ . MALDI-TOF-MS was performed on Bruker Daltonics LRF20 with Dithranol (1,8,9-trihydroxyanthracene) as the matrix.

### Synthesis

**2:** 4-nitrobenzaldehyde (300 mg, 1.985 mmol) and 2,4-dimethylpyrrole (420  $\mu\text{L}$ , 4.079 mmol) were mixed in a 300 mL round bottomed flask. The flask was degassed three times under high vacuum and back-filled with  $\text{N}_2$ . Dried MC (100 mL) and trifluoroacetic acid (several drops) were added and stirred for 12 h. Then, *p*-Chloranil (1 g, 4.067 mmol) was added and further stirred for 40 min at  $25^\circ\text{C}$ .  $\text{Et}_3\text{N}$  (2 mL) and  $\text{BF}_3\text{OEt}_2$  (3.2 mL, 25.33 mmol) were added, and the reaction mixture was further stirred for 1 h at  $25^\circ\text{C}$ . The solvent was evaporated under reduced pressure, and the crude product was purified by column chromatography (hexane/ethyl acetate, 8:1) to produce **2** as a reddish solid (91 mg, 14%).  $^1\text{H}$  NMR (400 MHz,  $\text{CDCl}_3$ ,  $25^\circ\text{C}$ )  $\delta$  = 8.40-8.38 (d, 2 H,  $J$  = 8.4 Hz), 7.55-7.53 (d, 2 H,  $J$  = 8.4 Hz), 6.02 (s, 2 H), 2.57 (s, 6 H), 1.36 ppm (s, 6 H); MALDI-TOF-MS:  $m/z$ : calcd. for  $\text{C}_{19}\text{H}_{18}\text{BF}_2\text{N}_3\text{O}_2$ : 369.17  $[\text{M}]^+$ ; found: 369.11.

**3:** 0.5 M HCl (4 mL) was added to a mixture solution of **2** (150 mg, 0.4063 mmol) and Fe (423.8 mg, 8.126 mmol) in THF (8.4 mL). The reaction mixture was refluxed for 7 h, and then

quenched with a saturated aqueous solution of  $\text{Na}_2\text{CO}_3$ . The organic phase was extracted with  $\text{CH}_2\text{Cl}_2$ , and then evaporated *in vacuo*. The residue was purified by column chromatography with  $\text{CH}_2\text{Cl}_2$  as the eluent to give **3** as an orange solid (90 mg, 65%).  $^1\text{H}$  NMR (400 MHz,  $\text{CDCl}_3$ , 25 °C)  $\delta$  = 7.00-6.98 (d, 8 H,  $J$  = 8.4 Hz), 6.77-6.75 (d, 2 H,  $J$  = 8.4 Hz), 5.97 (s, 2 H), 3.84 (s, 2 H), 2.54 (s, 6 H), 1.49 ppm (s, 6H); MALDI-TOF-MS:  $m/z$ : calcd. for  $\text{C}_{19}\text{H}_{20}\text{BF}_2\text{N}_3$ : 339.19  $[\text{M}]^+$ ; found: 339.37.

**4**: **3** (90 mg, 0.2653 mmol) and  $\text{K}_2\text{CO}_3$  (366.7 mg, 2.653 mmol) were mixed in a 50 mL flask. Acetone (10 mL) and propargyl bromide (200  $\mu\text{L}$ , 2.653 mmol) were added under nitrogen. The reaction mixture was refluxed for 12 h. After being cooled to room temperature, the solvent was removed. The residue was dissolved in  $\text{CH}_2\text{Cl}_2$  (100 mL) and the solution was washed with water (100 mL). The organic layer was evaporated *in vacuo*, and purified by column chromatography with hexane/ $\text{CH}_2\text{Cl}_2$  (1:2) to produce **4** as a reddish solid (34 mg, 32%).  $^1\text{H}$  NMR (400 MHz,  $\text{CDCl}_3$ , 25 °C)  $\delta$  = 7.16-7.14 (d, 2 H,  $J$  = 8.4 Hz), 7.04-7.02 (d, 2 H,  $J$  = 8.4 Hz), 5.97 (s, 2 H), 4.18 (s, 4 H), 2.55 (s, 6 H), 2.27 (s, 2 H), 1.45 ppm (s, 6H);  $^{13}\text{C}$  NMR (100 MHz,  $\text{CDCl}_3$ , 25 °C)  $\delta$  = 155.30, 148.41, 143.45, 142.40, 132.15, 129.01, 125.88, 121.23, 116.01, 78.93, 73.09, 40.63, 14.81, 0.21 ppm; MALDI-TOF-MS:  $m/z$ : calcd. for  $\text{C}_{25}\text{H}_{24}\text{BF}_2\text{N}_3$ : 415.29  $[\text{M}]^+$ ; found: 414.83.

**5**: Aniline (200 mg, 2.148 mmol) and  $\text{K}_2\text{CO}_3$  (1.48 g, 10.74 mmol) were mixed in a 50 mL round bottomed flask. Acetone (20 mL) and propargyl bromide (805.6  $\mu\text{L}$ , 10.74 mmol) were added under nitrogen. The reaction mixture was refluxed for 12 h. After being cooled to room temperature, the solvent was removed. The residue was dissolved in  $\text{CH}_2\text{Cl}_2$  (100 mL) and the solution was washed with water (100 mL). The organic layer was evaporated *in vacuo*, and purified by column chromatography with hexane/ $\text{CH}_2\text{Cl}_2$  (6:4) to produce **5** as a white solid (381 mg, 75%).  $^1\text{H}$  NMR (400 MHz,  $\text{CDCl}_3$ , 25 °C)  $\delta$  = 7.30-7.27 (t, 2 H,  $J$  = 7.0 Hz), 6.98-6.96 (d, 2 H,  $J$  = 8.8 Hz), 6.91-6.87 (t, 1 H,  $J$  = 7.4 Hz), 4.13 (s, 4 H), 2.25 (s, 2 H).

**6**: Ethylamine (1 g, 0.022 mol) and triethylamine (10 mL) were mixed in a 100 mL round bottomed flask at 0 °C. Propargyl bromide (2 mL, 0.047 mol) was added slowly and stirred at 0 °C. The residue was dissolved in  $\text{CH}_2\text{Cl}_2$  (100 mL) and the solution was washed with a saturated aqueous solution of NaOH (100 mL). The organic layer was evaporated *in vacuo* to give a yellow liquid, which was dissolved in THF without further purification.

**1<sub>Et</sub>**:  $\text{CuSO}_4 \cdot 5\text{H}_2\text{O}$  (560.8 mg, 2.246 mmol) and sodium ascorbate (445 mg, 2.25 mmol) were

added to a mixture of **6** (272 mg, 2.246 mmol) and methyl 4-(azidomethyl)benzoate (1.28 g, 6.738 mmol) in 10 mL THF/H<sub>2</sub>O (1:1). The reaction mixture was stirred for 7 h at 50 °C, and then the organic layer was separated. After evaporation of the solvent under reduced pressure, the residue was purified using column chromatography with 50% CH<sub>2</sub>Cl<sub>2</sub>/ethyl acetate as the eluent to give **1<sub>Et</sub>** as a white powder (678 mg, 60%). <sup>1</sup>H NMR (400 MHz, CDCl<sub>3</sub>, 25 °C)  $\delta$  = 8.04-8.02 (d, 4 H,  $J$  = 8.4 Hz), 7.55 (s, 2 H), 7.31-7.29 (d, 4 H,  $J$  = 8 Hz), 5.57 (s, 4 H), 3.92 (s, 6 H), 3.72 (s, 4 H), 2.54-2.52 (q, 4 H,  $J$  = 7.2 Hz), 1.14-1.11 ppm (t, 3 H,  $J$  = 7.2 Hz); <sup>13</sup>C NMR (100 MHz, CDCl<sub>3</sub>, 25 °C)  $\delta$  = 166.41, 144.99, 139.78, 130.39, 130.30, 127.72, 123.35, 53.54, 52.29, 47.49, 47.12, 12.39 ppm; MALDI-TOF-MS:  $m/z$ : calcd. for C<sub>26</sub>H<sub>29</sub>N<sub>7</sub>O<sub>4</sub>: 503.23 [M]<sup>+</sup>; found 501.72.

**1<sub>Ph</sub>**: CuSO<sub>4</sub>·5H<sub>2</sub>O (560.8 mg, 2.246 mmol) and sodium ascorbate (445 mg, 2.246 mmol) were added to a mixture of **5** (380 mg, 2.246 mmol) and methyl 4-(azidomethyl)benzoate (1.28 g, 6.738 mmol) in 10 mL THF/H<sub>2</sub>O (1:1). The reaction mixture was stirred for 7 h at 50 °C, and then the organic layer was separated. After evaporation of the solvent under reduced pressure, the residue was purified using column chromatography with 50% CH<sub>2</sub>Cl<sub>2</sub>/ethyl acetate as the eluent to give **1<sub>Ph</sub>** as a white powder (1.05 g, 85%). <sup>1</sup>H NMR (400 MHz, DMSO-*d*<sub>6</sub>, 25 °C)  $\delta$  = 7.96 (s, 2 H), 7.88-7.86 (d, 4 H,  $J$  = 8.4 Hz), 7.29-7.27 (d, 4 H,  $J$  = 8.4 Hz), 7.11-7.07 (t, 2 H,  $J$  = 7.8 Hz), 6.82-6.80 (d, 2 H,  $J$  = 8 Hz), 6.62-6.59 (t, 1 H,  $J$  = 7.2 Hz), 5.58 (s, 4 H), 4.60 (s, 4 H), 3.81 (s, 6 H); <sup>13</sup>C NMR (100 MHz, CDCl<sub>3</sub>, 25 °C)  $\delta$  = 166.57, 147.94, 146.17, 139.72, 130.61, 130.48, 129.48, 127.77, 122.36, 118.16, 113.91, 53.73, 52.46, 47.04 ppm; MALDI-TOF-MS:  $m/z$ : calcd. for C<sub>30</sub>H<sub>29</sub>N<sub>7</sub>O<sub>4</sub>: 551.23 [M]<sup>+</sup>; found 552.46.

**1<sub>BODIPY</sub>**: CuSO<sub>4</sub>·5H<sub>2</sub>O (60 mg, 0.2402 mmol) and sodium ascorbate (48 mg, 0.2402 mmol) were added to a mixture of **4** (100 mg, 0.2402 mmol) and methyl 4-(azidomethyl)benzoate (200 mg, 0.9608 mmol) in 10 mL THF/H<sub>2</sub>O (1:1). The reaction mixture was stirred for 7 h at 50 °C, and then the organic layer was separated. After evaporation of the solvent under reduced pressure, the residue was purified using column chromatography with 50% CH<sub>2</sub>Cl<sub>2</sub>/ethyl acetate as the eluent to give **1<sub>BODIPY</sub>** as an orange powder (65.2 mg, 34%). <sup>1</sup>H NMR (400 MHz, CD<sub>3</sub>CN, 25 °C)  $\delta$  = 7.94-7.92 (d, 4 H,  $J$  = 8.4 Hz), 7.58 (s, 2 H), 7.27-7.25 (d, 4 H,  $J$  = 8.4 Hz), 7.04-7.02 (d, 2 H,  $J$  = 8.8 Hz), 6.99-6.96 (d, 2 H,  $J$  = 8.8 Hz), 6.02 (s, 2 H), 5.54 (s, 4 H), 4.71 (s, 4 H), 3.84 (s, 6 H), 2.46 (s, 6 H), 1.29 ppm (s, 6 H); <sup>13</sup>C NMR (100 MHz, CD<sub>3</sub>CN, 25 °C)  $\delta$  = 167.56, 156.14, 149.85, 146.52, 144.86, 142.36, 133.18, 131.50,

131.16, 130.10, 129.99, 129.10, 124.45, 124.07, 122.31, 115.28, 54.24, 53.17, 47.64, 15.13 ppm; MALDI-TOF-MS:  $m/z$ : calcd. for  $C_{43}H_{42}BF_2N_9O_4$ : 797.66  $[M]^+$ ; found 798.79.

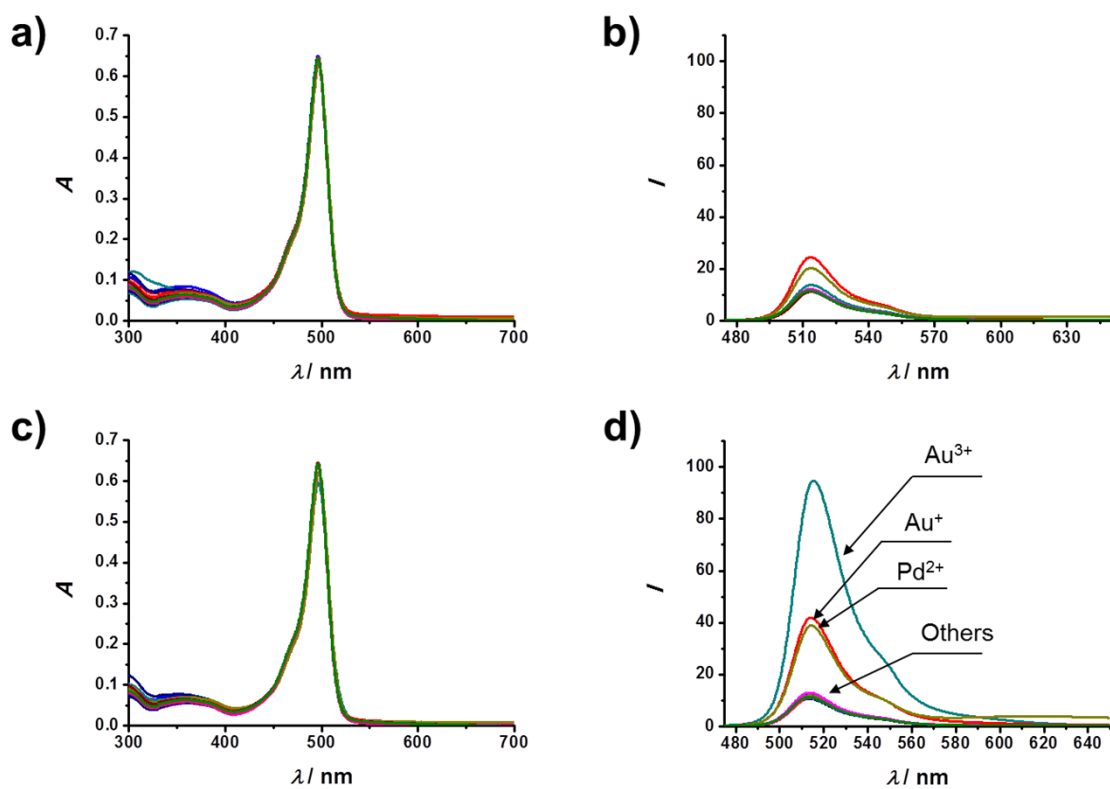

**Figure S1.** UV-Vis and Fluorescence response of **1**<sub>BODIPY</sub> (10  $\mu$ M) to various metal cation (2 eq) additions in MeCN/H<sub>2</sub>O (1:1 v/v); a), b) before light irradiation; c), d) after light irradiation (365 nm).

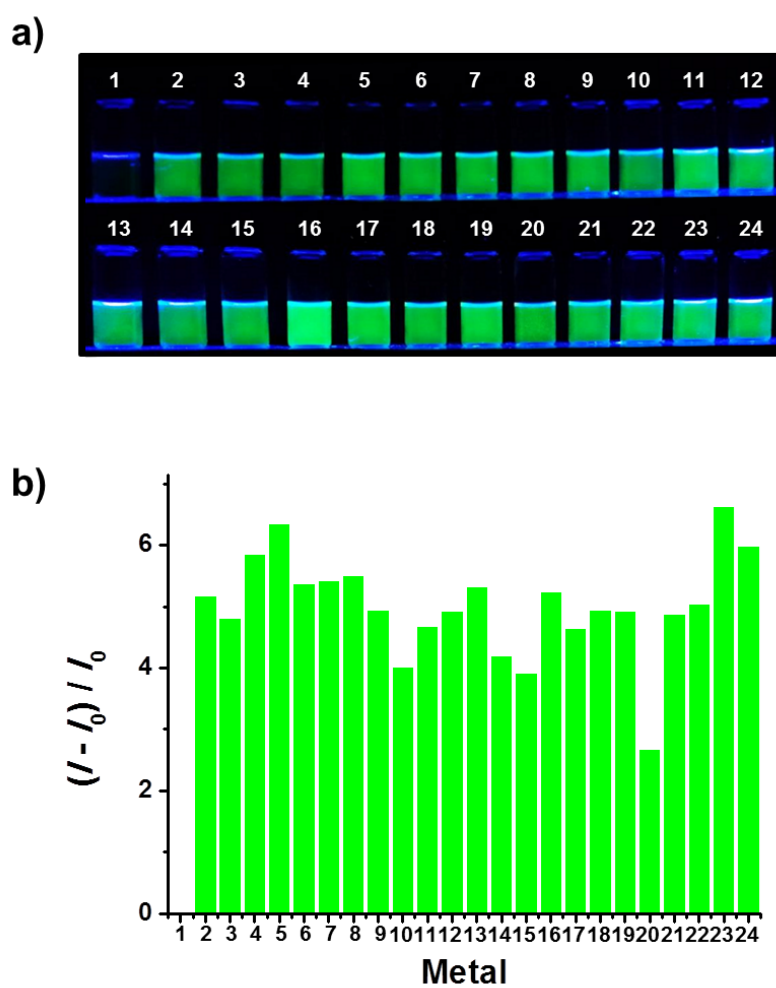

**Figure S2.** Fluorescence changes of **1**<sub>BODIPY</sub> (10  $\mu$ M) by the addition of  $\text{Au}^{3+}$  ion (2 eq) with 2 min of UV irradiation (365 nm) in MeCN/ $\text{H}_2\text{O}$  (1:1 v/v) containing various other metal ions (2 eq). a) fluorescence images, b) emission intensity changes at 515 nm upon excitation at 460 nm.

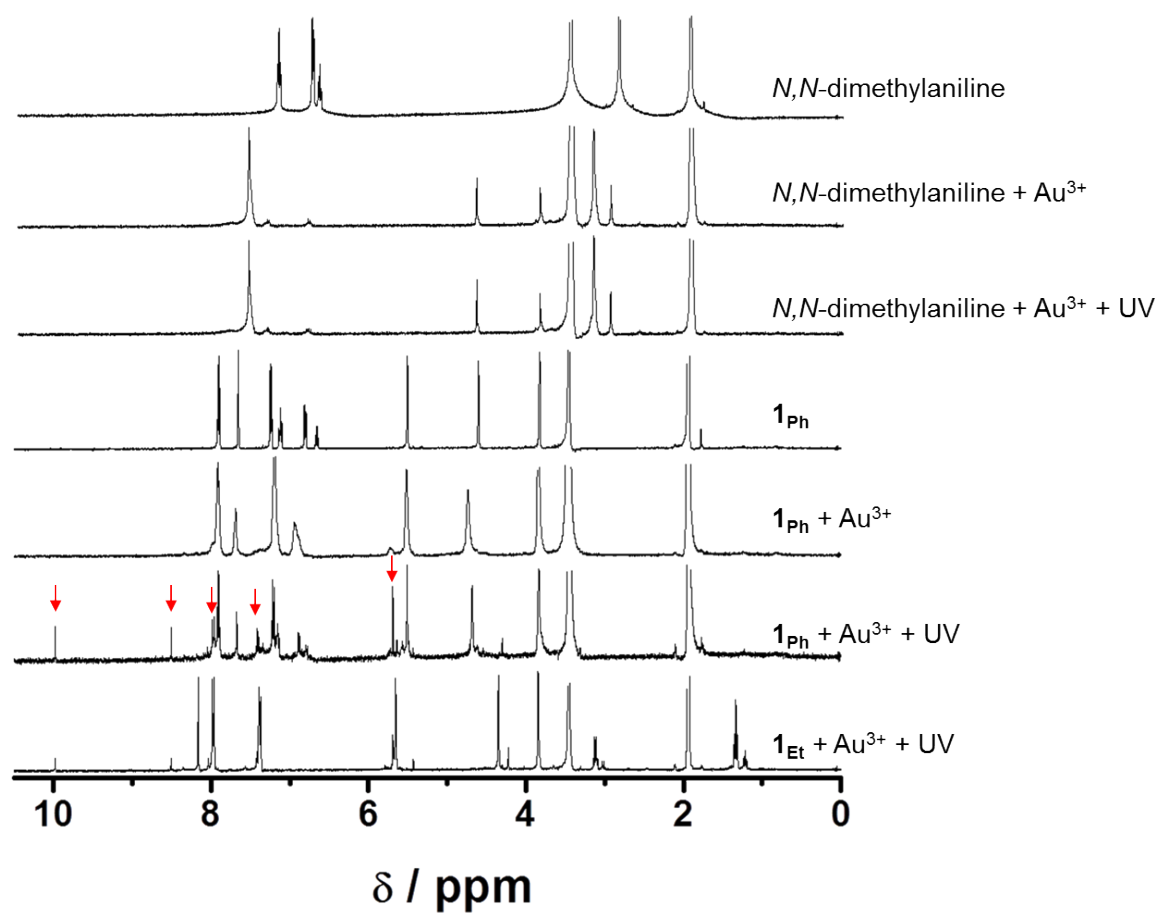

**Figure S3.**  $^1\text{H}$  NMR spectral change of structural fragments of  $\mathbf{1}_{\text{BODIPY}}$  by  $\text{Au}^{3+}$  addition and UV irradiation (365 nm). Red arrow indicates a new set of proton signals generated by UV irradiation.



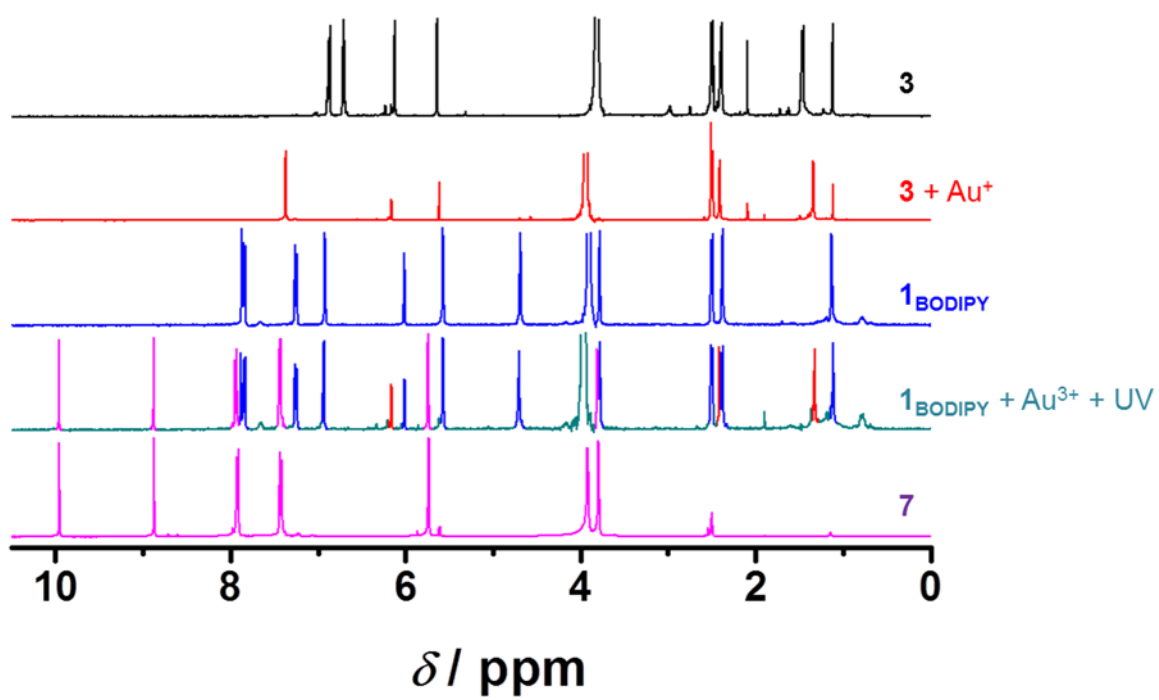

**Figure S4.**  $^1\text{H}$  NMR spectra of **3**, **1<sub>BODIPY</sub>**, and **7** in DMSO/D<sub>2</sub>O (5:1 v/v) with different conditions.

$C_{12}H_{11}N_3O_3 = 245.0800$

[M+H<sup>+</sup>] 246.0873 [246.0860-246.0885]

1 #262 RT: 4.44 AV: 1 NL: 5.40E6  
T: FTMS + p ESI Full ms [200.00-500.00]

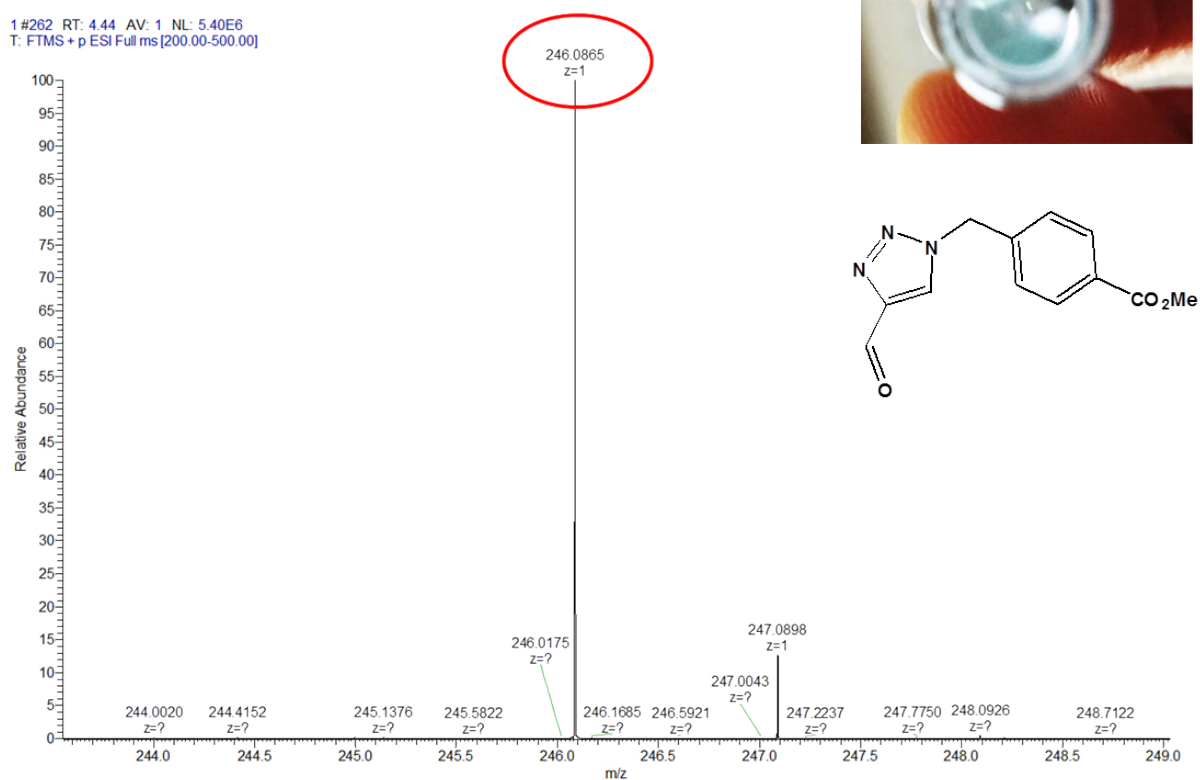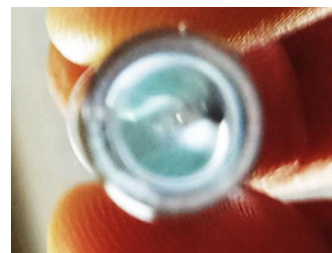

**Figure S5.** High resolution mass spectrum of **7** and an image of Tollen's test for aldehyde.

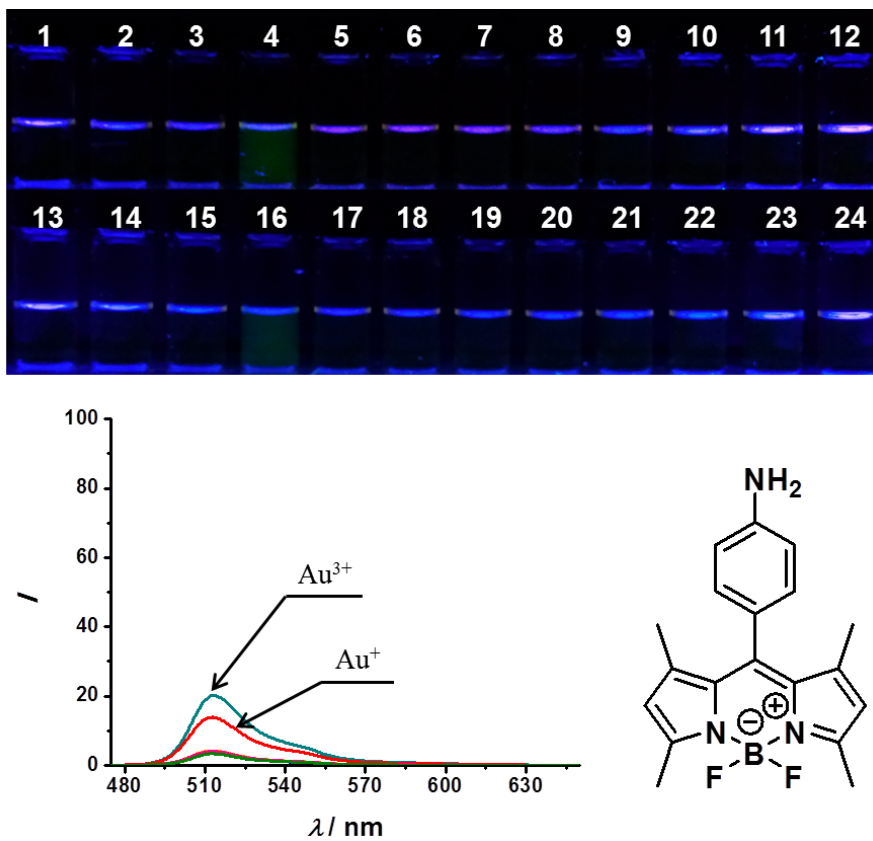

**Figure S6.** Fluorescence response of **3** (10 μM) to various metal ions (2 eq) in MeCN/H<sub>2</sub>O (1:1 v/v).

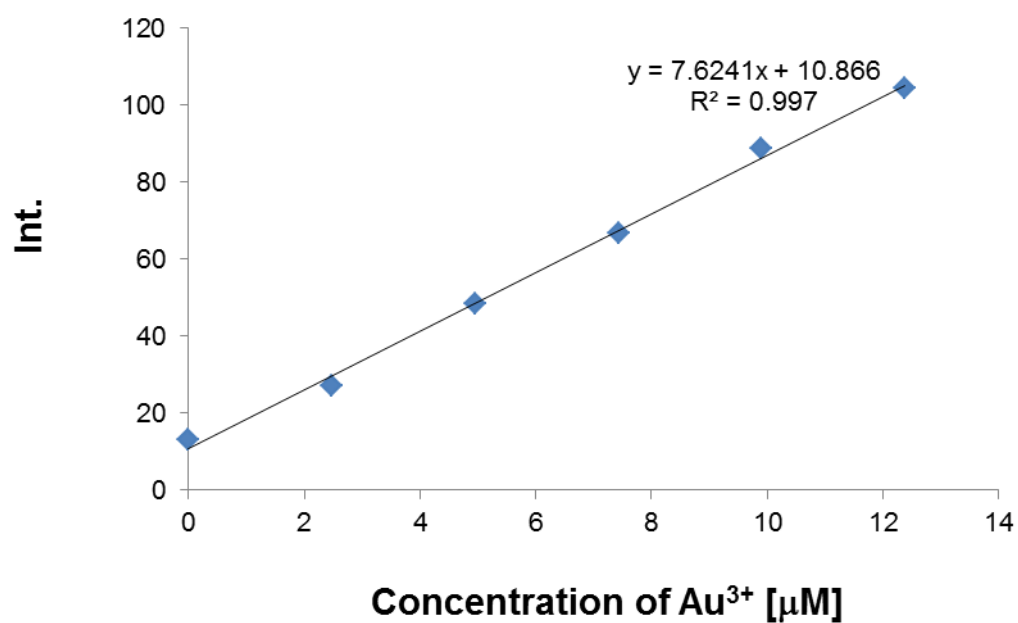

**Figure S7.** Linear correlation between fluorescence intensity of **1<sub>BODIPY</sub>** and Au<sup>3+</sup> concentration. The fluorescence emission intensity was measure after 2 min of UV irradiation.

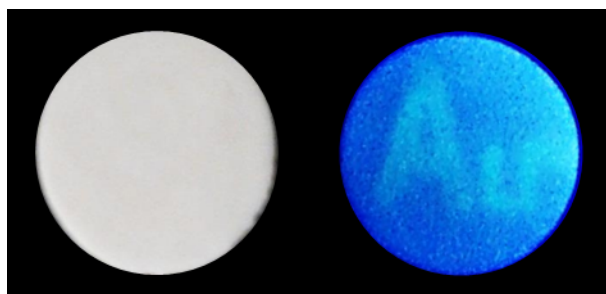

**Figure S8.** Fluorescence pattern obtained by **1<sub>BODIPY</sub>** and AuCl<sub>3</sub> solution. To get the fluorescence pattern a filter paper was dipped into the solution of **1<sub>BODIPY</sub>** and then AuCl<sub>3</sub> solution was thinly coated onto the surface of filter paper. Finally, the paper was covered with photomask and exposure to UV-handy lamp (365 nm) for 1 min.

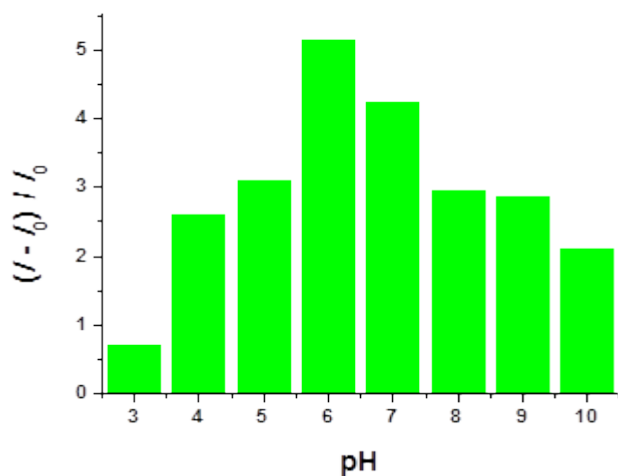

**Figure S9.** pH dependent fluorescence changes of **1**<sub>BODIPY</sub> (10  $\mu$ M) to  $\text{Au}^{3+}$  ion (2 eq) in MeCN/0.01 M PBS buffer (1:1 v/v, pH 3-10),  $\lambda_{\text{ex}} = 460$  nm,  $\lambda_{\text{em}} = 515$  nm.

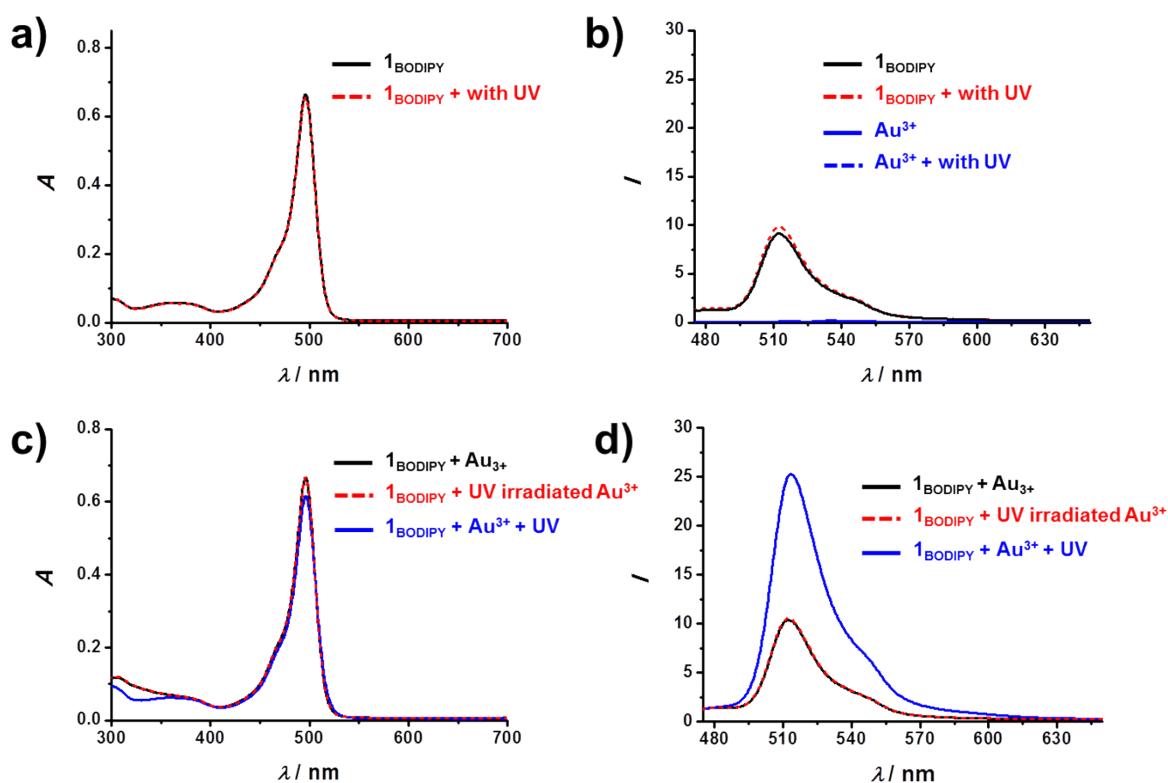

**Figure S10.** The influence of UV irradiation on **1**<sub>BODIPY</sub> (10  $\mu$ M) and  $\text{Au}^{3+}$  (20  $\mu$ M) in MeCN/ $\text{H}_2\text{O}$  (1:1 v/v). a) Absorption and b) emission spectra of **1**<sub>BODIPY</sub> without addition of  $\text{Au}^{3+}$ , c) absorption and d) emission spectra of **1**<sub>BODIPY</sub> with  $\text{Au}^{3+}$ , where red dashed line is the result of mixing **1**<sub>BODIPY</sub> with UV-irradiated  $\text{Au}^{3+}$ . UV-irradiation was carried out using UV-handly lamp (365 nm) for 2 min.

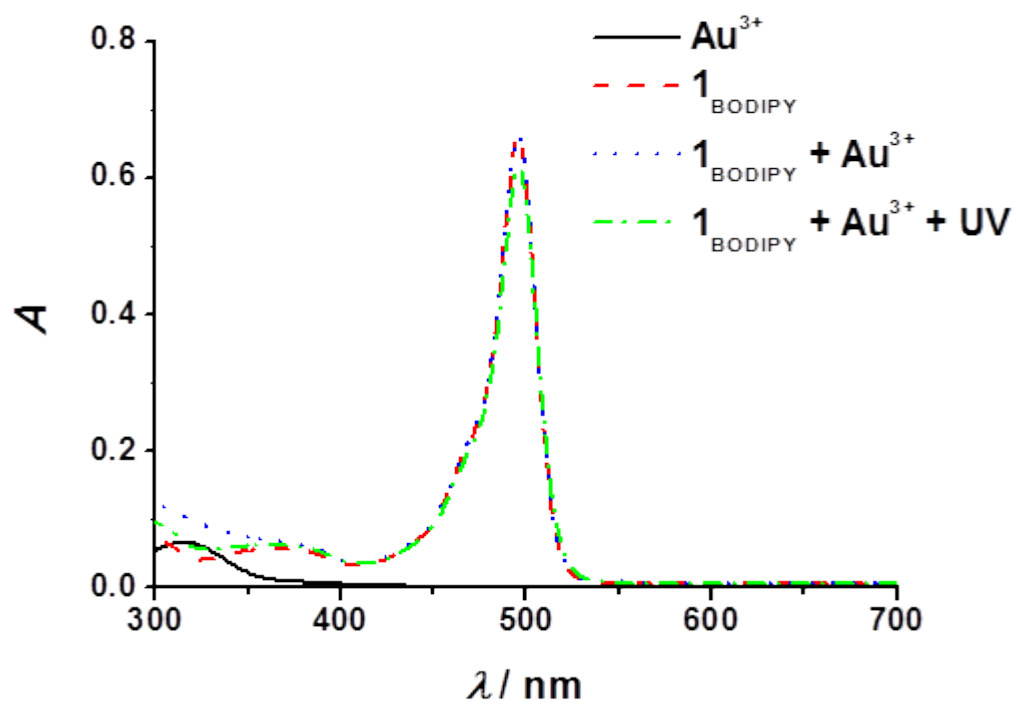

**Figure S11.** UV-Vis absorption spectra of  $\text{Au}^{3+}$  (20  $\mu\text{M}$ ),  $1_{\text{BODIPY}}$  (10  $\mu\text{M}$ ), and  $\text{Au}^{3+}$  containing  $1_{\text{BODIPY}}$  (10  $\mu\text{M}$ ) in MeCN/ $\text{H}_2\text{O}$  (1:1 v/v).
